# Supplementary material for: Cytotoxicity Induction by the Oxidative Reactivity of Nanoparticles Revealed by a Combinatorial GNP Library with Diverse Redox Properties
Source: MDPI journal article supplement (doi:10.3390/molecules26123630), 2021-06-14
Supplement: s1 [file s1]

## **Supporting Information**

### **Cytotoxicity induction by the oxidative reactivity of nanoparticles revealed by a combinatorial GNP library with diverse redox properties**

Shenqing Wang, Xiliang Yan, Gaoxing Su, Bing Yan\*

#### **Contents**

Figure S1. TEM images of 80 GNPs in the whole library.

Figure S2. The characterization of physicochemical properties and biological effects of 80 GNPs in the whole library.

Figure S3. When the ligand does not contain ferrocene substituents, GNPs do not show obvious redox activity.

Figure S4. The redox activities of 80 GNPs in the whole library were characterized by cyclic voltammetry.

Figure S5. The dose response curves of 80 GNPs in the whole library.

Figure S6. The relationship between the redox activity of 80 GNPs and their hydrodynamic diameter or number of ligand uploads.

Figure S7. The relationship between the cellular effects of 80 GNPs and hydrophobic property or surface charge.

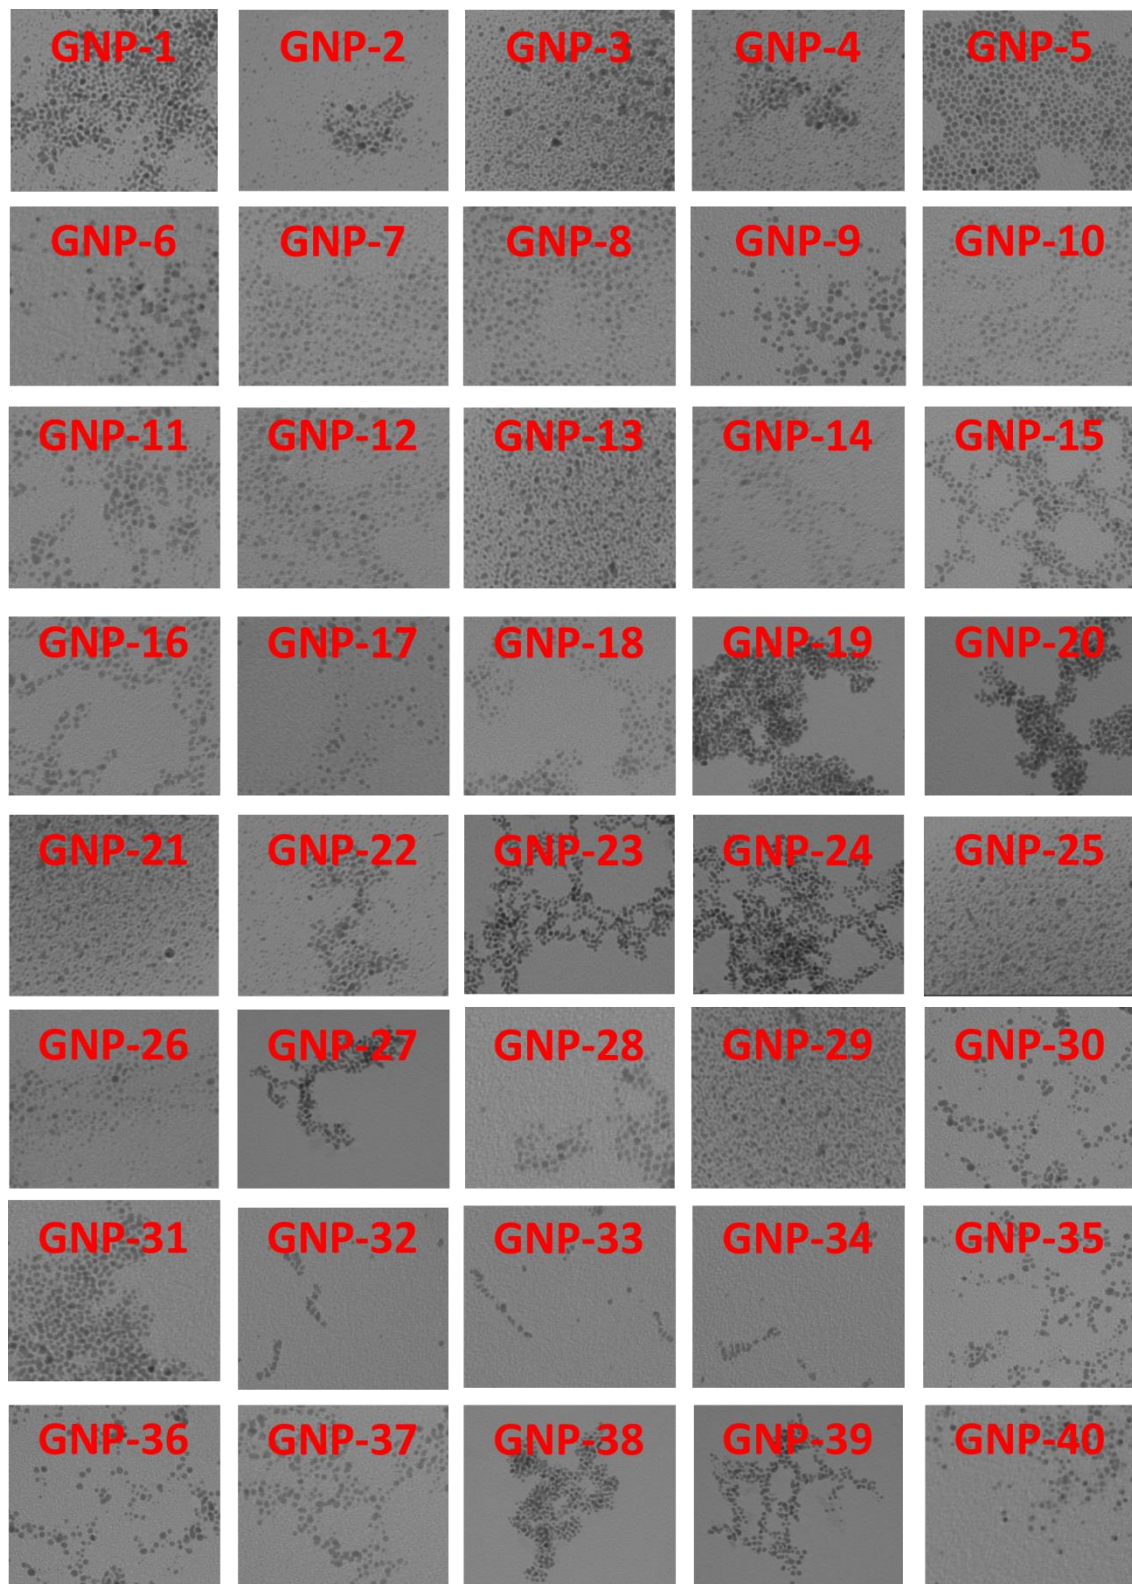

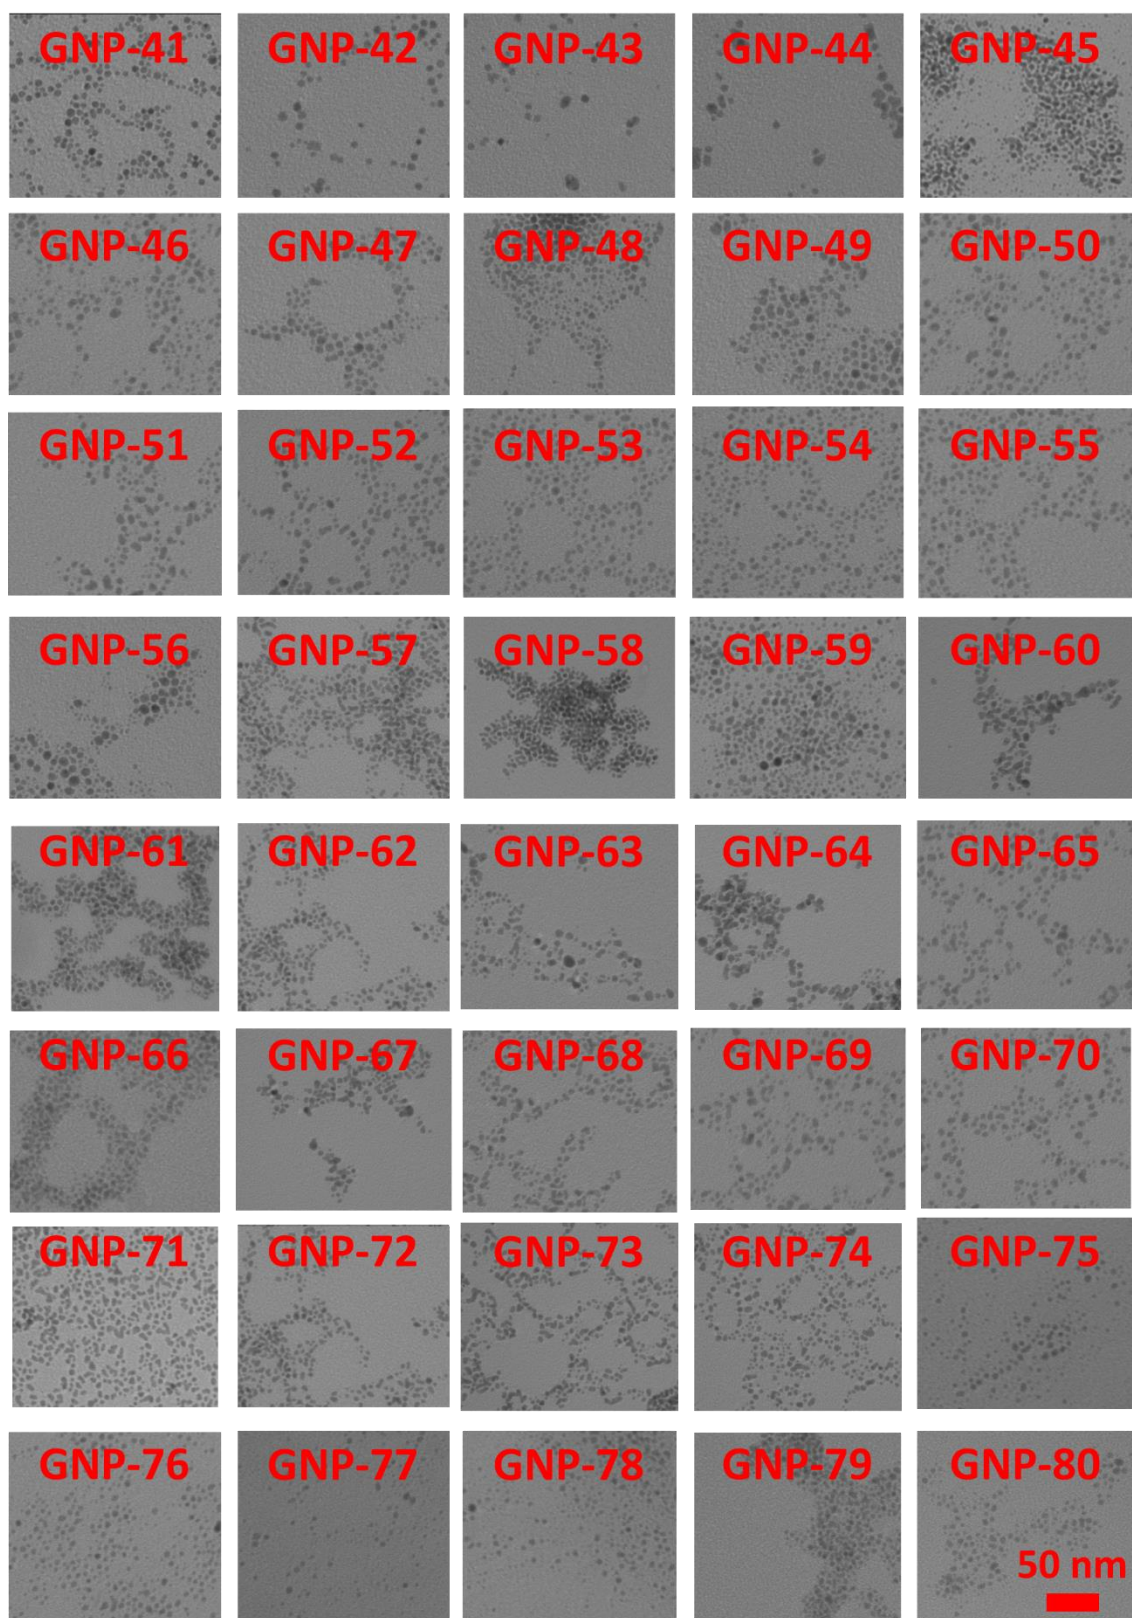

Figure S1. TEM images of 80 GNPs in the whole library.

a

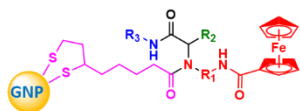

Log P

|                |  | R <sub>2</sub>   |      |      |      |       |
|----------------|--|------------------|------|------|------|-------|
|                |  | R <sub>3</sub> = |      |      |      |       |
| R <sub>1</sub> |  |                  |      |      |      |       |
|                |  | 0.99             | 0.52 | -0.5 | 0.87 | 0.69  |
|                |  | 1.35             | 0.57 | -0.9 | 0.68 | 0.77  |
|                |  | 0.91             | 0.3  | -0.7 | 0.59 | -0.43 |
|                |  | 0.63             | -1.3 | 2.39 | 1.79 | 0.42  |

|                |  | R <sub>2</sub>   |       |      |       |      |
|----------------|--|------------------|-------|------|-------|------|
|                |  | R <sub>3</sub> = |       |      |       |      |
| R <sub>1</sub> |  |                  |       |      |       |      |
|                |  | 0.07             | -0.11 | 0.02 | -0.41 | 0.47 |
|                |  | 0.84             | 0.45  | 0.75 | 0.89  | 0.27 |
|                |  | 0.33             | 0.91  | 0.85 | 0.24  | 0.37 |
|                |  | 0.91             | 0.51  | 0.98 | 0.77  | 0.32 |

|                |  | R <sub>2</sub>   |       |      |       |      |
|----------------|--|------------------|-------|------|-------|------|
|                |  | R <sub>3</sub> = |       |      |       |      |
| R <sub>1</sub> |  |                  |       |      |       |      |
|                |  | -0.61            | 0.88  | 0.74 | -0.51 | 0.78 |
|                |  | -0.44            | 0.55  | 0.21 | 0.18  | 0.76 |
|                |  | 0.58             | -0.08 | 0.33 | -0.16 | 0.77 |
|                |  | 0.68             | 0.76  | 0.74 | 0.74  | 0.76 |

|                |  | R <sub>2</sub>   |      |      |      |       |
|----------------|--|------------------|------|------|------|-------|
|                |  | R <sub>3</sub> = |      |      |      |       |
| R <sub>1</sub> |  |                  |      |      |      |       |
|                |  | 1.66             | 0.55 | 0.76 | 1.09 | 0.26  |
|                |  | 0.82             | 0.68 | 1.27 | 0.23 | -0.11 |
|                |  | 0.83             | 0.52 | -0.1 | 0.62 | -0.5  |
|                |  | 0.36             | 0.92 | 0    | 0.92 | -0.3  |

b

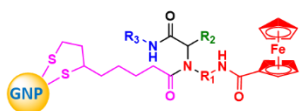

Zeta potential (mV)

|                |  | R <sub>2</sub>   |       |       |       |       |
|----------------|--|------------------|-------|-------|-------|-------|
|                |  | R <sub>3</sub> = |       |       |       |       |
| R <sub>1</sub> |  |                  |       |       |       |       |
|                |  | -8.3             | -25.6 | -38.5 | -39.4 | -29.7 |
|                |  | 0                | -27.3 | -30.9 | -28.1 | -44.7 |
|                |  | -7.3             | -31.5 | -20.1 | -58.6 | -32   |
|                |  | -5.6             | 3.5   | -3.9  | -50.9 | -27   |

|                |  | R <sub>2</sub>   |       |       |       |       |
|----------------|--|------------------|-------|-------|-------|-------|
|                |  | R <sub>3</sub> = |       |       |       |       |
| R <sub>1</sub> |  |                  |       |       |       |       |
|                |  | -31.4            | -40.7 | -43.3 | -40.6 | -33   |
|                |  | -36.3            | -43.1 | -39.7 | -36.7 | -32.3 |
|                |  | 25.4             | -24.1 | -33.2 | -28.7 | -26.7 |
|                |  | -30              | -10.9 | -8.7  | -14.9 | -19.1 |

|                |  | R <sub>2</sub>   |       |       |       |       |
|----------------|--|------------------|-------|-------|-------|-------|
|                |  | R <sub>3</sub> = |       |       |       |       |
| R <sub>1</sub> |  |                  |       |       |       |       |
|                |  | -37              | -45.5 | -34.3 | -51   | -14.9 |
|                |  | -36.3            | -19   | -27.4 | -51.5 | -22.7 |
|                |  | -41.2            | -35   | -31.4 | -40.1 | -7.6  |
|                |  | -1.2             | 15.5  | 4.8   | -28   | -19.4 |

|                |  | R <sub>2</sub>   |       |       |       |       |
|----------------|--|------------------|-------|-------|-------|-------|
|                |  | R <sub>3</sub> = |       |       |       |       |
| R <sub>1</sub> |  |                  |       |       |       |       |
|                |  | 15.4             | -13.8 | -18.9 | 1     | -29.9 |
|                |  | 6.3              | -23.7 | -21.5 | 1.8   | -13.3 |
|                |  | -6.4             | -24.9 | -18.3 | -26.3 | -32.3 |
|                |  | -20.4            | -37   | -30.4 | -34.7 | -26.3 |

c

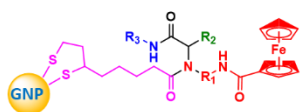

Number of ligands per particle (GNPs)

|                |  | R <sub>2</sub>   |     |     |     |     |
|----------------|--|------------------|-----|-----|-----|-----|
|                |  | R <sub>3</sub> = |     |     |     |     |
| R <sub>1</sub> |  |                  |     |     |     |     |
|                |  | 314              | 337 | 318 | 342 | 309 |
|                |  | 295              | 254 | 308 | 332 | 300 |
|                |  | 303              | 346 | 263 | 265 | 313 |
|                |  | 272              | 297 | 321 | 299 | 330 |

|                |  | R <sub>2</sub>   |     |     |     |     |
|----------------|--|------------------|-----|-----|-----|-----|
|                |  | R <sub>3</sub> = |     |     |     |     |
| R <sub>1</sub> |  |                  |     |     |     |     |
|                |  | 278              | 334 | 324 | 284 | 284 |
|                |  | 317              | 314 | 300 | 276 | 270 |
|                |  | 283              | 341 | 312 | 286 | 296 |
|                |  | 279              | 259 | 255 | 281 | 333 |

|                |  | R <sub>2</sub>   |     |     |     |     |
|----------------|--|------------------|-----|-----|-----|-----|
|                |  | R <sub>3</sub> = |     |     |     |     |
| R <sub>1</sub> |  |                  |     |     |     |     |
|                |  | 315              | 341 | 323 | 323 | 335 |
|                |  | 274              | 300 | 282 | 359 | 308 |
|                |  | 294              | 329 | 352 | 341 | 272 |
|                |  | 284              | 342 | 295 | 350 | 240 |

|                |  | R <sub>2</sub>   |     |     |     |     |
|----------------|--|------------------|-----|-----|-----|-----|
|                |  | R <sub>3</sub> = |     |     |     |     |
| R <sub>1</sub> |  |                  |     |     |     |     |
|                |  | 308              | 328 | 285 | 329 | 307 |
|                |  | 324              | 300 | 271 | 277 | 304 |
|                |  | 313              | 314 | 293 | 314 | 350 |
|                |  | 313              | 257 | 265 | 301 | 277 |



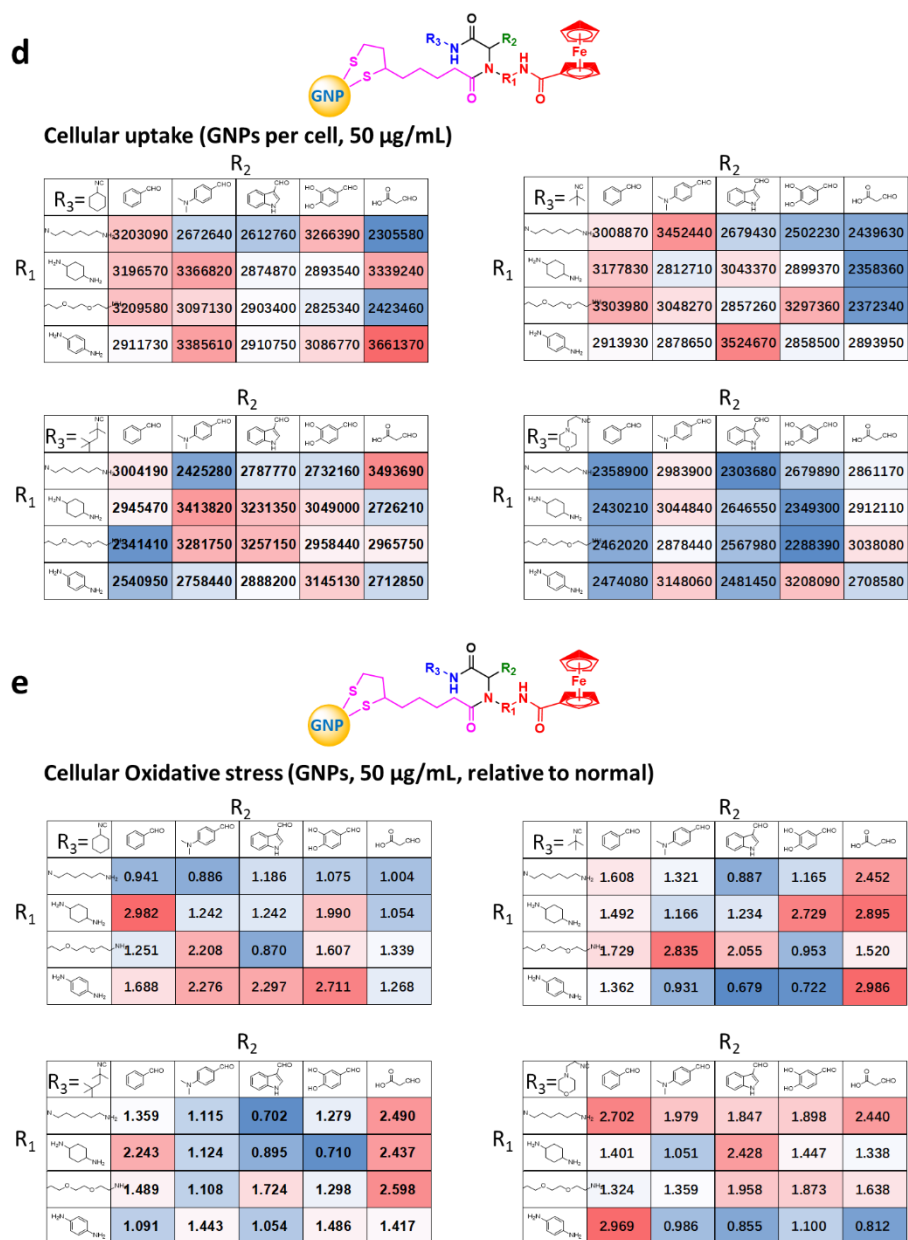

Figure S2. The characterization of physicochemical properties and biological effects of 80 GNPs in the whole library. (a) Log P value, (b) Zeta potential, (c) Number of ligands per GNP, (d) Cellular oxidative stress, (e) Cellular uptake.

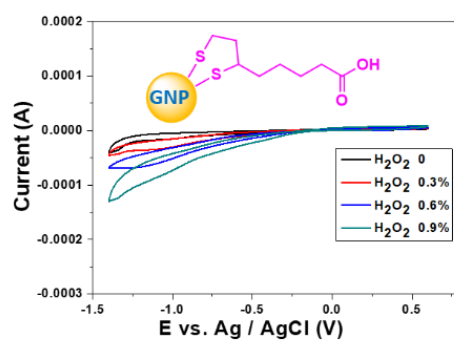

Figure S3. When the ligand does not contain ferrocene substituents, GNPs do not show obvious redox activity. For GNPs, the existence of ferrocene group is a necessary factor to obtain redox activity.

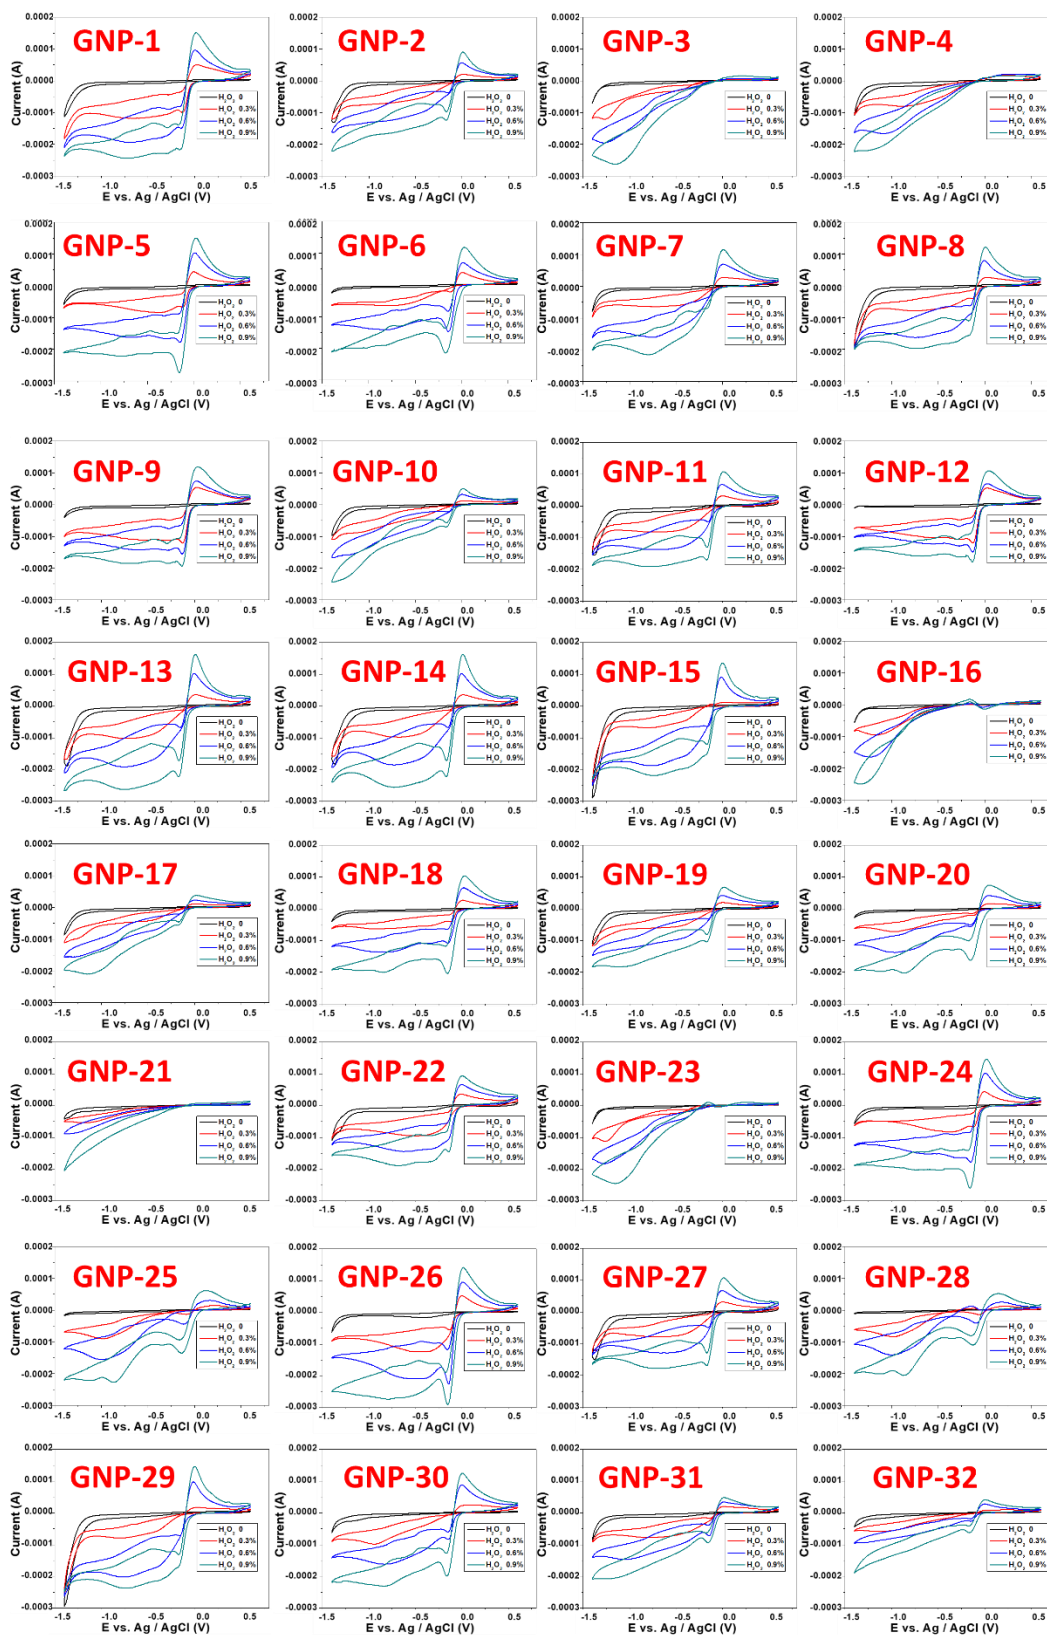

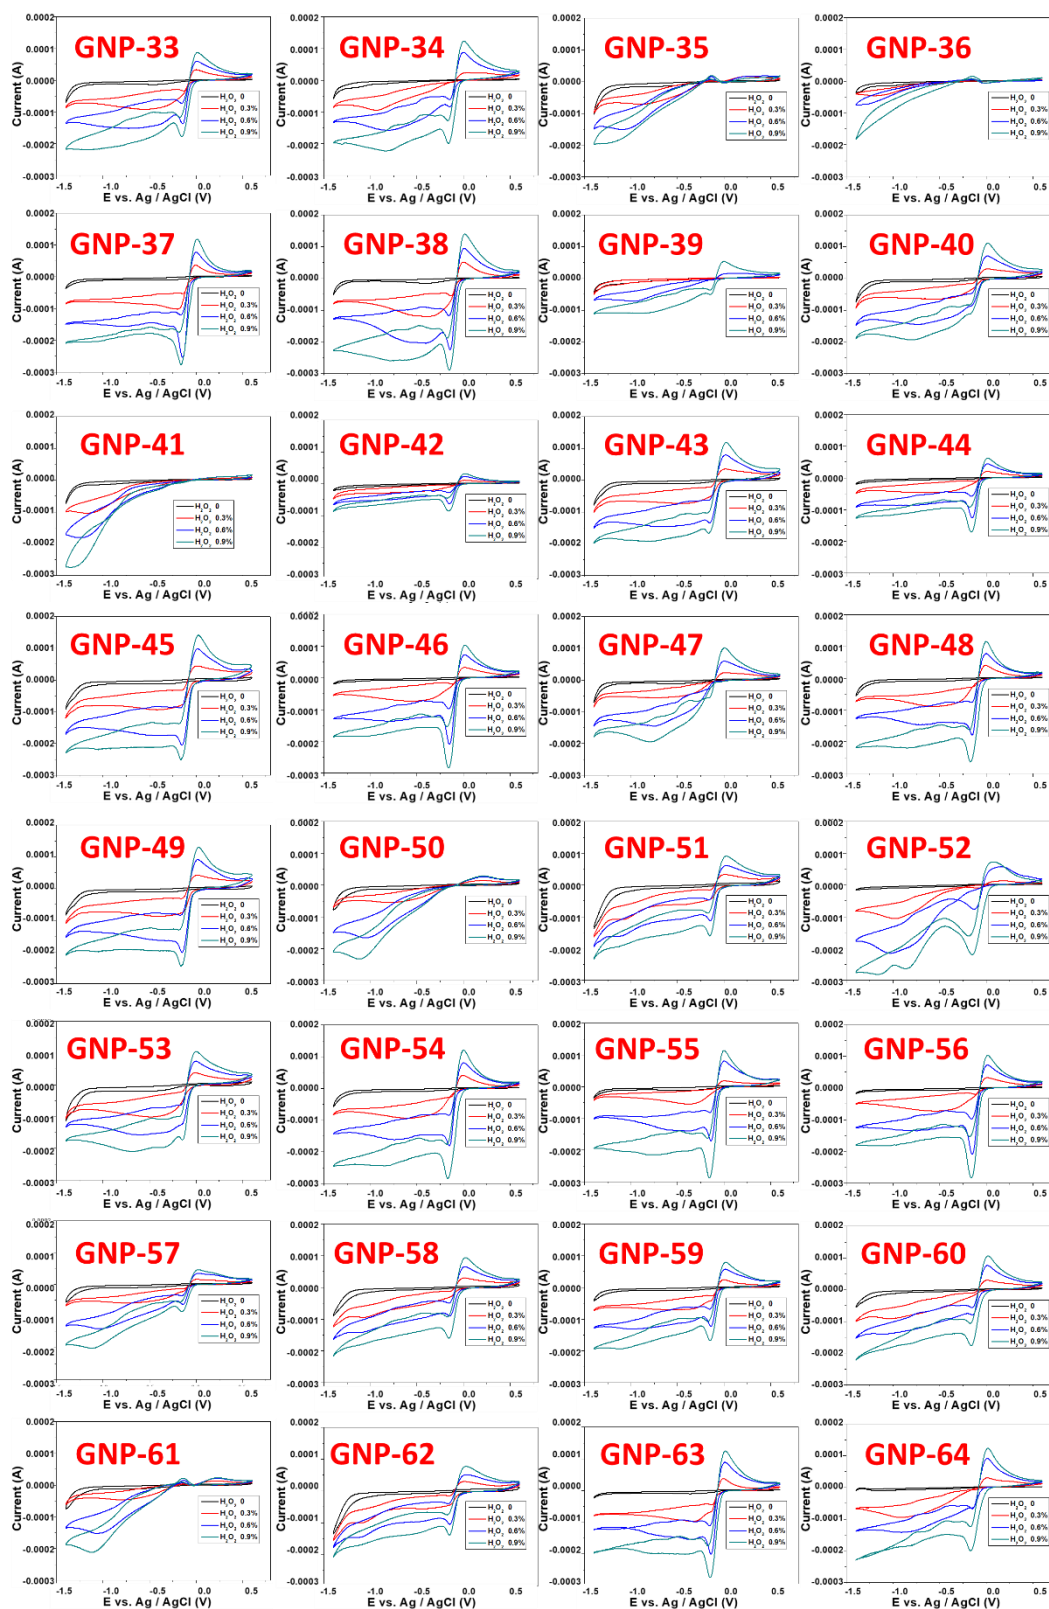



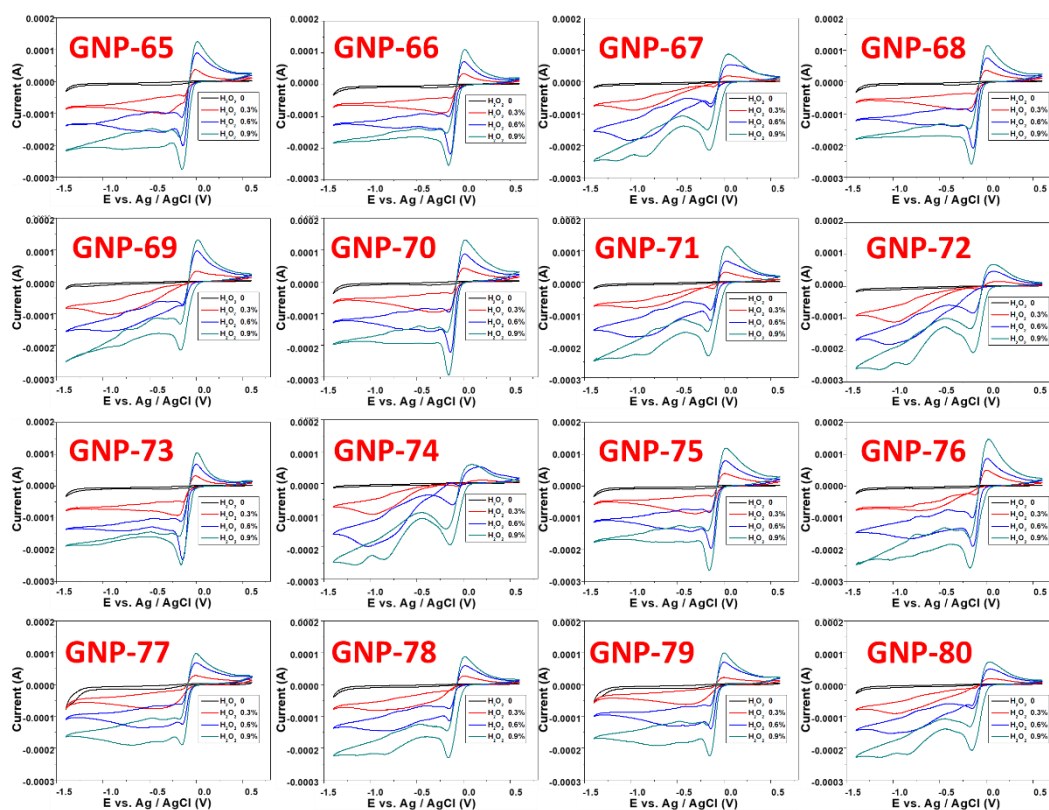

Figure S4. The redox activities of 80 GNPs in the whole library were characterized by cyclic voltammetry.

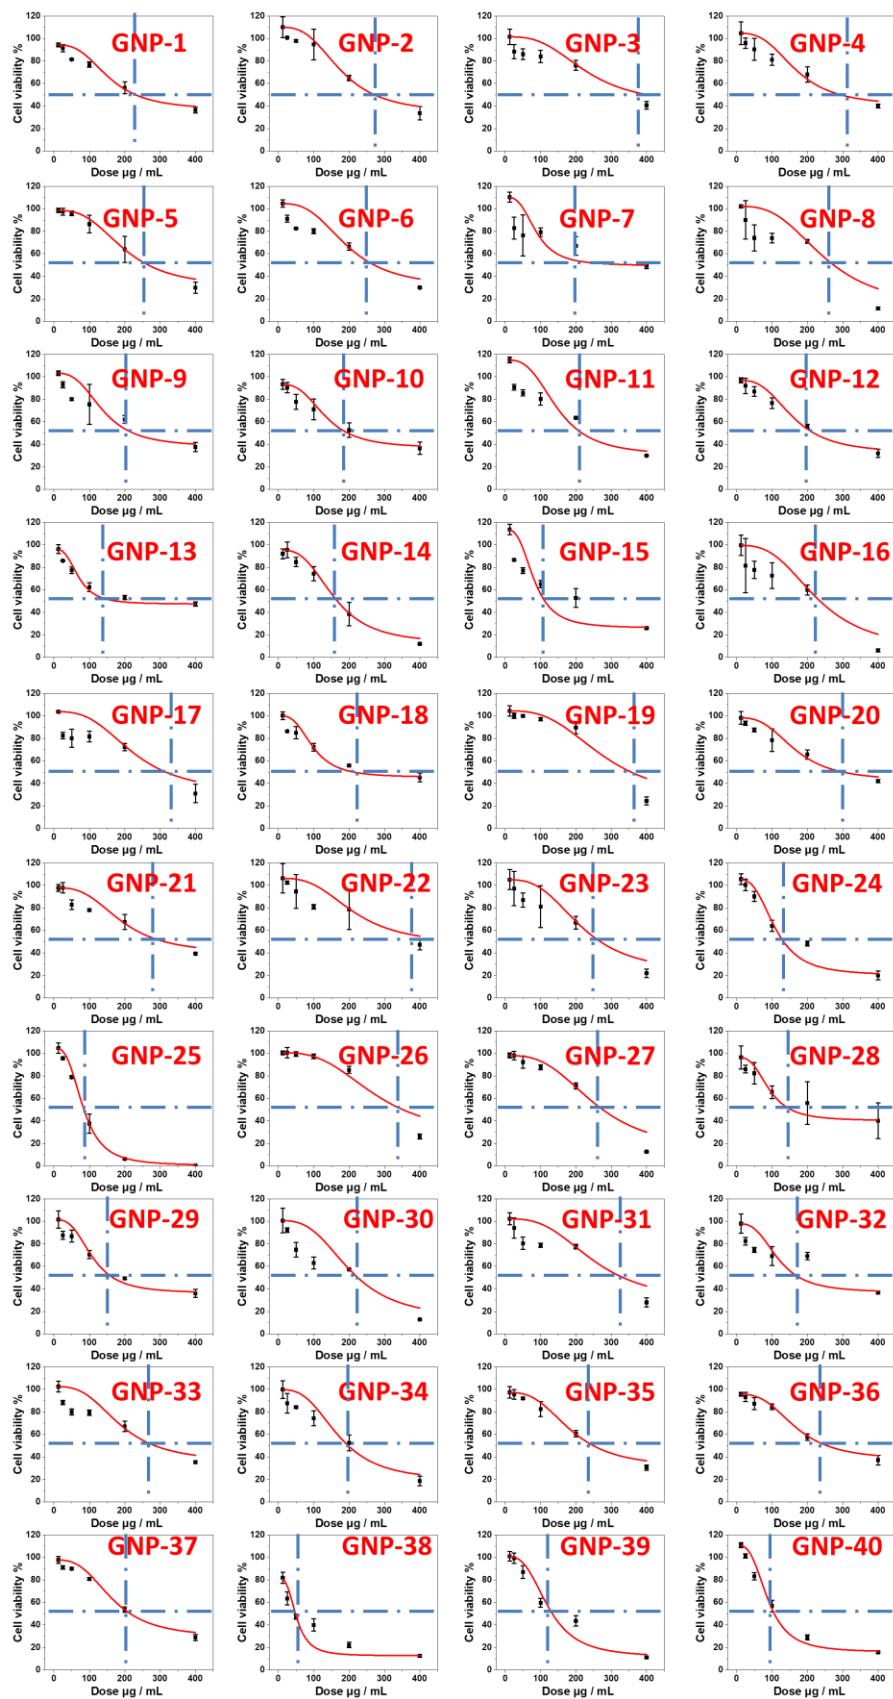

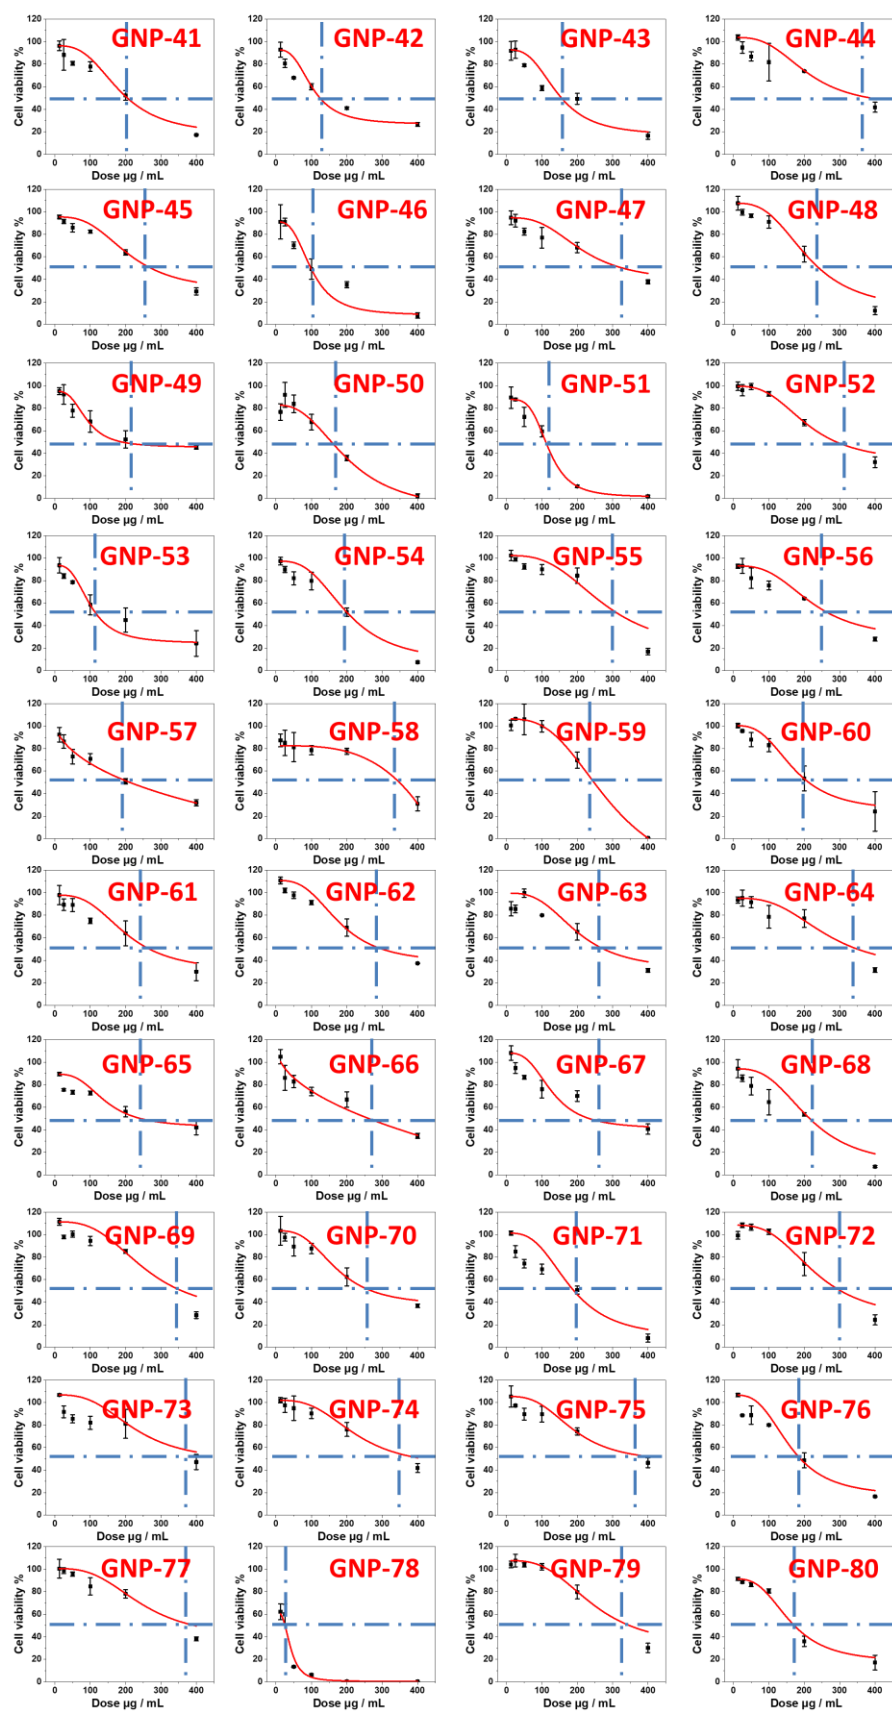

Figure S5. The dose response curves of 80 GNPs in the whole library, blue dotted line:

EC50 labeled.

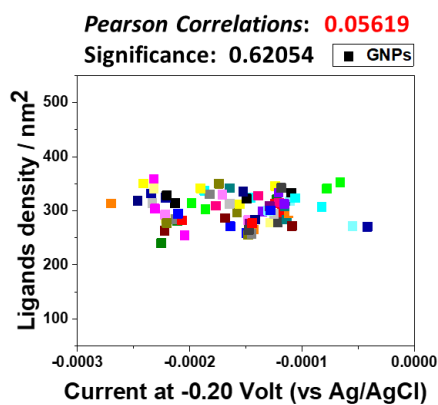

Figure S6. The relationship between the redox activity of 80 GNP<sub>s</sub> and the number of ligand uploads.

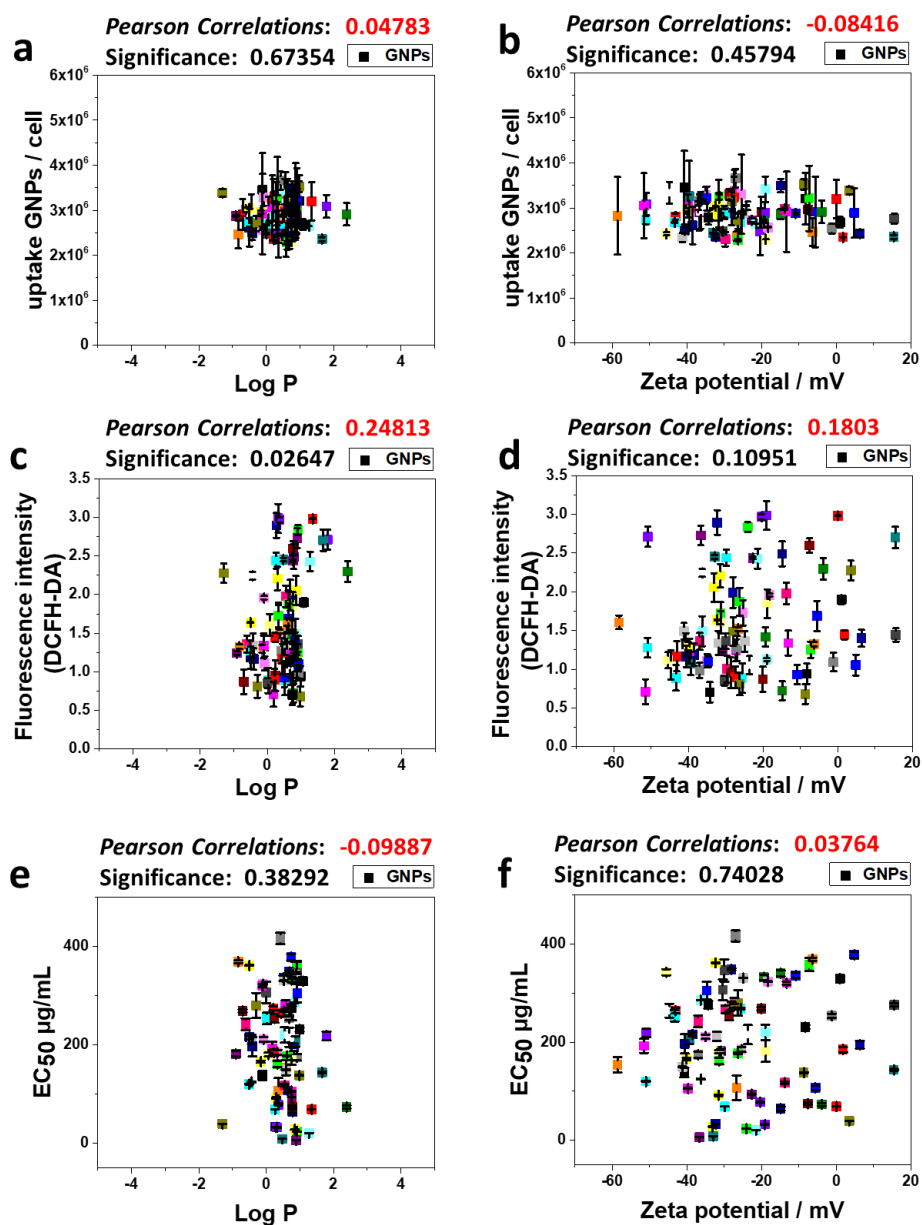

Figure S7. The relationship between the cellular effects of 80 GNPs and hydrophobic properties or surface charge.
